# Supplementary material
Source: PubMed Central journal article supplement (PMC5115563)
Supplement: ADVS-3-0g-s001.pdf [file ADVS-3-0g-s001.pdf]

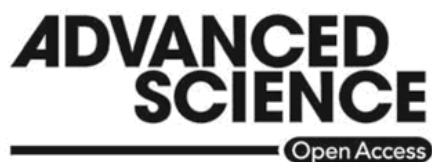

## Supporting Information

for *Adv. Sci.*, DOI: 10.1002/advs.201500426

**Anchoring CoO Domains on CoSe<sub>2</sub> Nanobelts as Bifunctional Electrocatalysts for Overall Water Splitting in Neutral Media**

*Kaidan Li, Jingfang Zhang, Rui Wu, Yifu Yu, and Bin Zhang\**

## Supporting Information

### **Anchoring CoO Domains on CoSe<sub>2</sub> Nanobelts as Bifunctional Electrocatalysts for Overall Water Splitting in Neutral Media**

*Kaidan Li, Jingfang Zhang, Rui Wu, Yifu Yu, and Bin Zhang\**

K. Li, J. Zhang, R. Wu, Dr. Y. Yu, Prof. B. Zhang  
Department of Chemistry, School of Science, and Tianjin Key Laboratory of Molecular  
Optoelectronic Science  
Tianjin University  
Tianjin, 300072, China  
E-mail: bzhang@tju.edu.cn

K. Li, J. Zhang, Prof. B. Zhang  
Collaborative Innovation Center of Chemical Science and Engineering  
Tianjin 300072, China

### Characterization of CoSe<sub>2</sub>-DETA

The CoSe<sub>2</sub>/DETA (DETA = diethylenetriamine) nanobelts grown on Ti mesh were synthesized by the reported method with slight modifications.<sup>[1]</sup> We can see from Figure S1, that nanobelts were grown on Ti mesh on a large scale, with 30-300 nm in width and several dozens of micrometers in length. The TEM image further indicates the flexible nanobelt structure. The XRD patterns are consisted with that of the reported CoSe<sub>2</sub>/DETA,<sup>[2]</sup> further supporting the formation of CoSe<sub>2</sub>-DETA precursors.

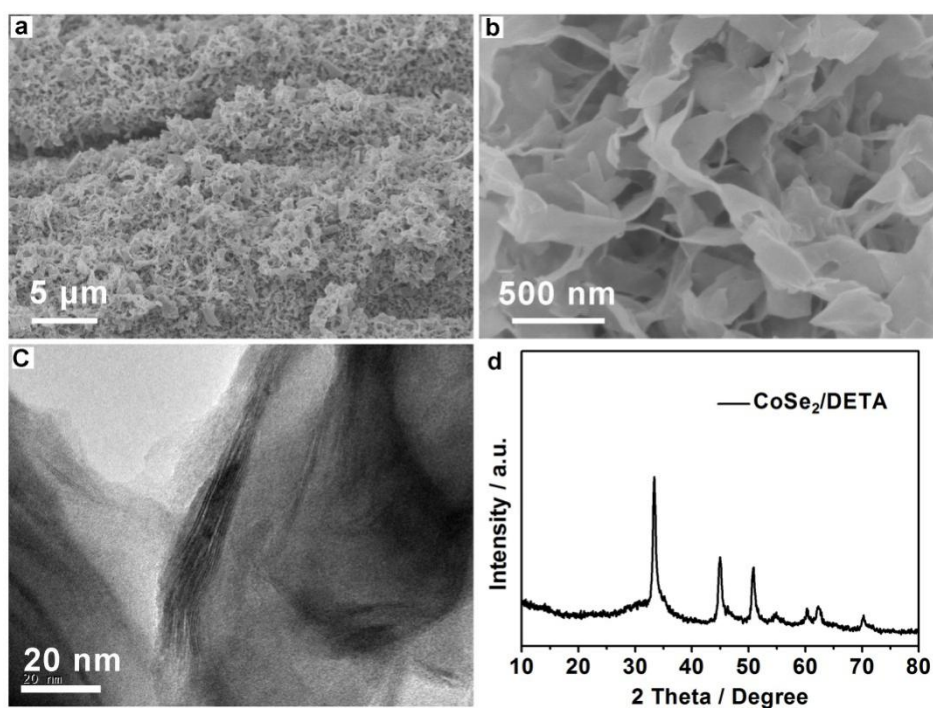

**Figure S1.** (a) Low- and (b) high-magnification SEM images of CoSe<sub>2</sub>-DETA precursors. (c) A typical TEM image and (d) XRD pattern of CoSe<sub>2</sub>-DETA precursors.

### Elements in the as-prepared CoO/CoSe<sub>2</sub>

Energy-dispersive X-ray spectroscopy (EDX) reveals that the sample on Ti mesh is composed of O, Co and Se elements.

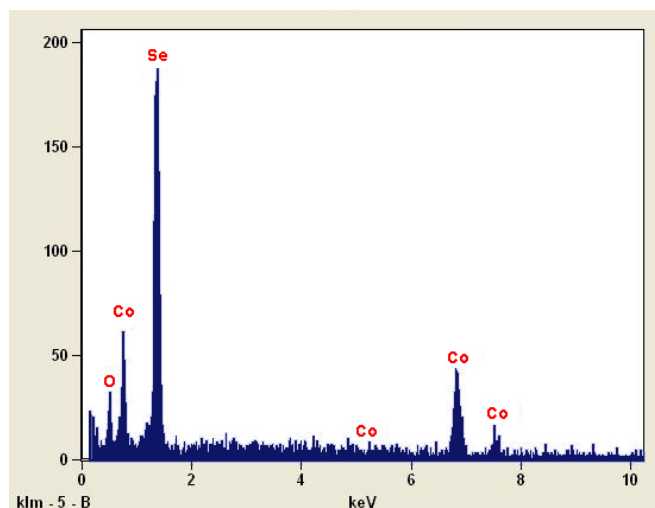

**Figure S2.** The EDX spectrum of the as-prepared CoO/CoSe<sub>2</sub> synthesized by one-step calcination of CoSe<sub>2</sub>-DETA (DETA = diethylenetriamine) precursors at 450 °C in mixed O<sub>2</sub> (0.018 vol%)/Ar atmosphere.

### HRTEM image of CoO/CoSe<sub>2</sub>

The lattice spacing of 2.10 Å and 2.60 Å, as expected for CoO (200) planes and CoSe<sub>2</sub> (210) planes, are observed for domains and nanobelts, respectively. This observation reveals that small CoO domains were anchored on the CoSe<sub>2</sub> nanobelts.

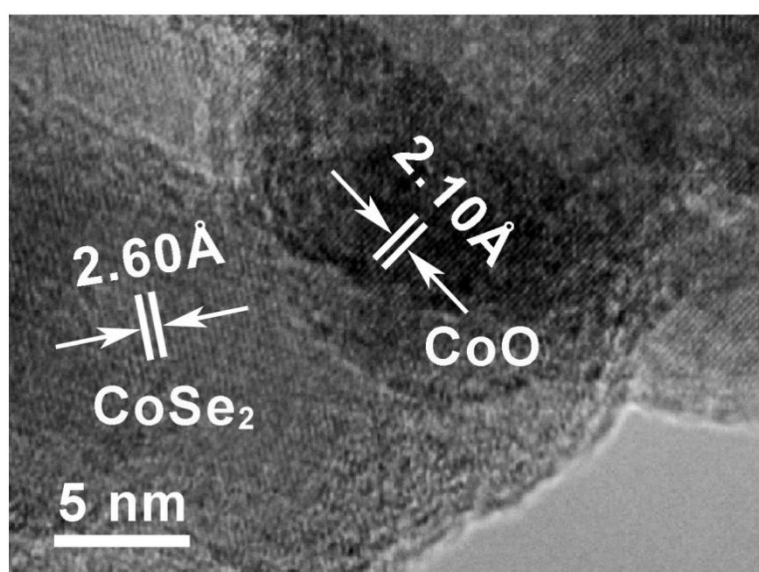

**Figure S3.** HRTEM image of the as-prepared CoO/CoSe<sub>2</sub> synthesized by one-step calcination of CoSe<sub>2</sub>-DETA (DETA = diethylenetriamine) precursors at 450 °C in mixed O<sub>2</sub> (0.018 vol%)/Ar atmosphere.

### Characterization of pure CoSe<sub>2</sub>

For comparison, the pure CoSe<sub>2</sub> was obtained by annealing CoSe<sub>2</sub>-DETA precursors in high-purity Ar atmosphere with other conditions remaining unchanged. As we can see from Figure S4, nanobelt-like morphology can be preserved, which is similar to that of the as-prepared CoO/CoSe<sub>2</sub>. Additionally, all XRD patterns can be attributed to pure CoSe<sub>2</sub> (JCPDS no. 09-0234), suggesting that CoSe<sub>2</sub> can be synthesized in the absence of oxygen in the Ar atmosphere.

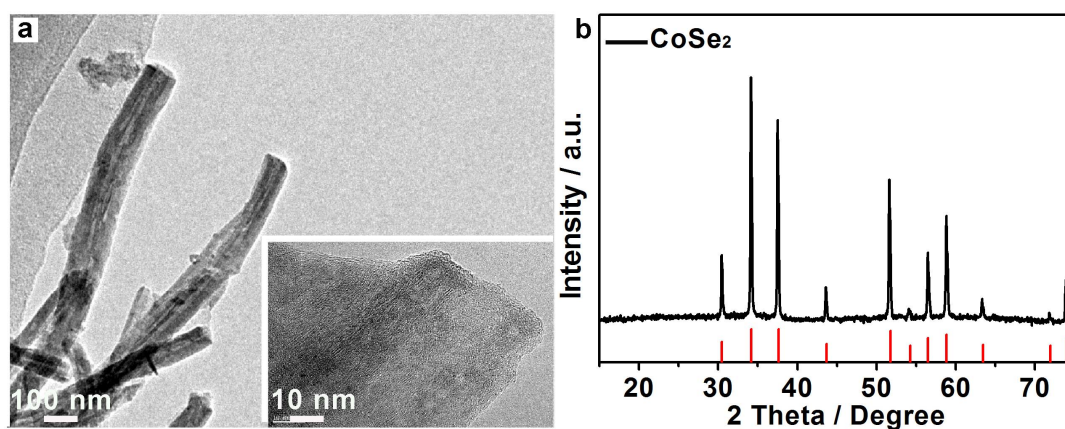

**Figure S4.** (a) TEM image and (b) XRD pattern of pure CoSe<sub>2</sub> nanobelts. Inset in (a) is the high-resolution TEM image.

### Characterization of commercial CoO

CoO was purchased from Aladdin Industrial Corporation (AR) and was used as received without further treatment.

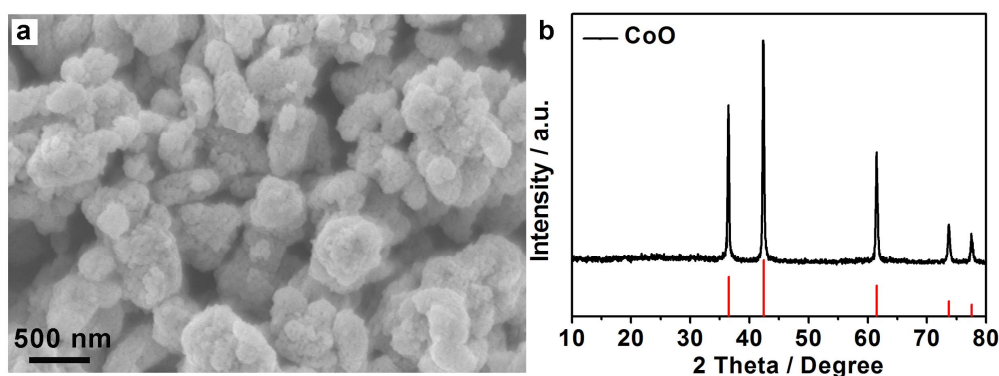

**Figure S5.** (a) SEM image of CoO. (b) XRD pattern of pure CoO sample corresponding to CoO (JCPDS no. 43-1004).

**Calculation of exchange current density**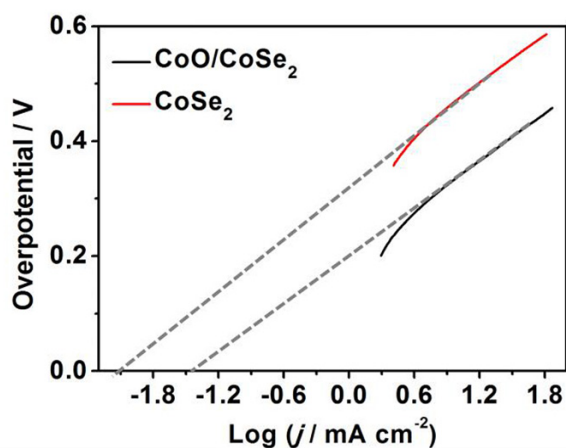**Figure S6.** Calculated exchange current density by extrapolating the Tafel plot.**Characterization of commercial RuO<sub>2</sub>**

RuO<sub>2</sub> was purchased from Aladdin Industrial Corporation (AR) and was used as received without further treatment. The measured Tafel slope of commercial RuO<sub>2</sub> is 162 mV dec<sup>-1</sup>.

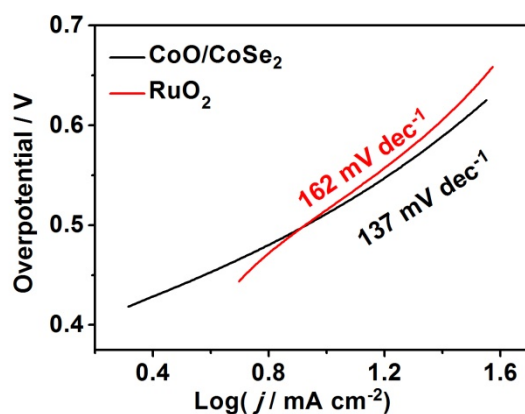**Figure S7.** Tafel plots for CoO/CoSe<sub>2</sub> and commercial RuO<sub>2</sub>.

### Stability of CoO/CoSe<sub>2</sub> during HER and OER

The SEM and TEM images suggest that the CoO/CoSe<sub>2</sub> electrocatalyst still maintains the original nanobelt structure after HER and OER measurements.

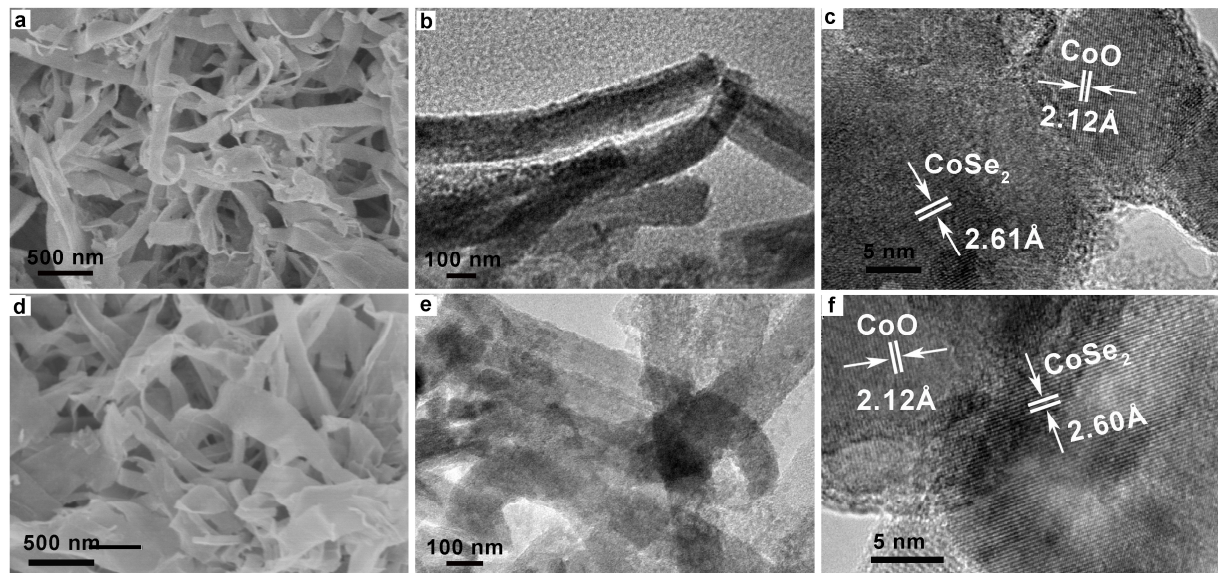

**Figure S8.** (a) SEM, (b) TEM and (c) HRTEM images of CoO/CoSe<sub>2</sub> after HER tests. (d) SEM, (e) TEM and (f) HRTEM images of CoO/CoSe<sub>2</sub> after OER tests.

The corresponding XPS spectra of Co 2p region indicate that a similar peak profile is displayed for post-HER (780.4 eV) or post-OER (780.2 eV) catalyst in spite of a slight positive shift compared with the as-prepared CoO/CoSe<sub>2</sub> electrocatalyst (779.6 eV).

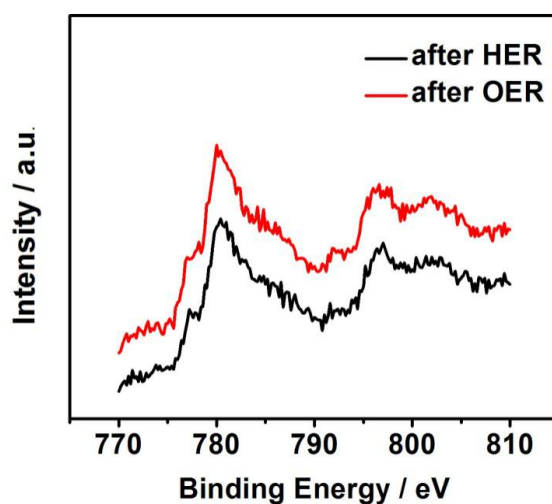

**Figure S9.** XPS spectra of the Co 2p region for CoO/CoSe<sub>2</sub> after HER and OER.

### Characterization of Ti mesh

Ti mesh (diameter: 0.12 mm) was purchased from Hongyun Metal Products Co., Ltd.

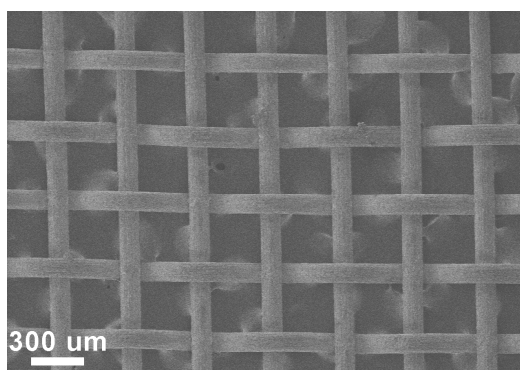

**Figure S10.** SEM image of Ti mesh.

### Linear sweep voltammetry (LSV) curves (HER and OER) before and after I-R corrected

All the potential values measured were calibrated by using the following equation:

$E_{\text{after}} = E_{\text{before}} - IR$ , where  $I$  was the current flowing through the cell and  $R$  was the ohmic resistance of the cell. The resistances,  $R$ , were measured by the IR compensation function available on the electrochemical workstation (CHI 660D, CH Instruments, Austin, TX).

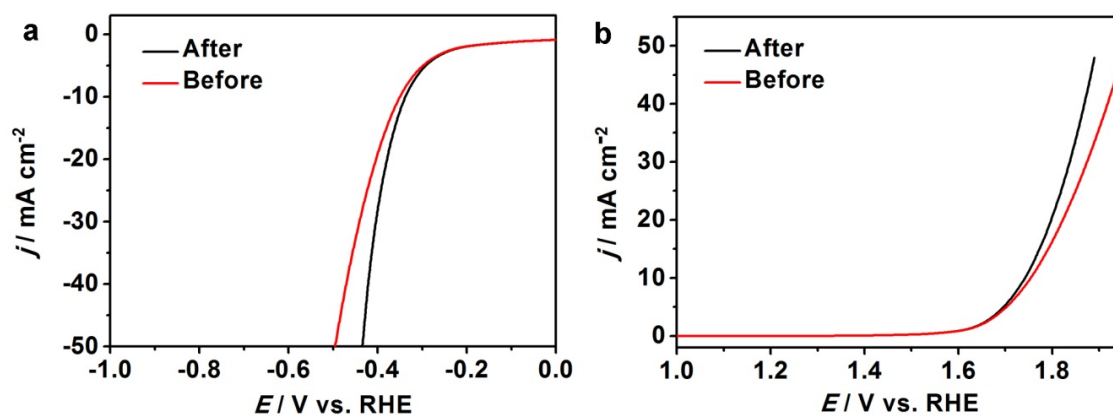

**Figure S11.** (a) HER polarization curves of CoO/CoSe<sub>2</sub> before and after I-R correction. (b) OER polarization curves of CoO/CoSe<sub>2</sub> before and after I-R correction.



**Table S1.** Comparison of the HER activity of CoO/CoSe<sub>2</sub> under neutral conditions with some representative HER catalysts recently reported.

| Sample                                                    | Loading/substrate                                                        | electrolyte                                 | Current density ( <i>j</i> )/ mA cm <sup>-2</sup> | Overpotential/mV at the corresponding <i>j</i> | Reference                                                        |
|-----------------------------------------------------------|--------------------------------------------------------------------------|---------------------------------------------|---------------------------------------------------|------------------------------------------------|------------------------------------------------------------------|
| Co@nitrogen-rich carbon nanotubes                         | 0.28 mg/cm <sup>2</sup>                                                  | 0.1 M phosphate buffer (pH = 7)             | 2<br>10                                           | 380<br>540                                     | <i>Angew. Chem.</i> <b>2014</b> , <i>126</i> , 4461              |
| CoO/CoSe <sub>2</sub>                                     | 2 mg cm <sup>-2</sup><br>Ti mesh                                         | 0.5 M phosphate buffer solution (pH = 6.86) | 2<br>10<br>50                                     | 200<br>337<br>434                              | This work                                                        |
| Metallic cobalt @ cobalt-oxo / hydroxo phosphate          | FTO                                                                      | 0.5M phosphate buffer (KPi, pH = 7)         | 2                                                 | 385                                            | <i>Nat. Mater.</i> <b>2012</b> , <i>11</i> , 802                 |
| Electrodeposited cobalt-sulfide                           | Co = 1.35<br>□ μmol/cm <sup>2</sup><br>(79.6 μg/cm <sup>2</sup> )<br>FTO | 1.0 M potassium phosphate buffer pH = 7     | 2                                                 | 85                                             | <i>J. Am. Chem. Soc.</i> <b>2013</b> , <i>135</i> , 17699        |
| Co–Mo–S film                                              | glassy carbon                                                            | phosphate buffer pH = 7                     | 1.04                                              | 200                                            | <i>Chem. Sci.</i> <b>2012</b> , <i>3</i> , 2515                  |
| Ni <sub>3</sub> S <sub>2</sub> nanosheet arrays / Ni foam | 1.6 mg/cm <sup>2</sup><br>Ni foam                                        | phosphate buffer pH = 7                     | 10                                                | 170                                            | <i>J. Am. Chem. Soc.</i> <b>2015</b> , DOI: 10.1021/jacs.5b08186 |
| Mo <sub>2</sub> C                                         | —                                                                        | phosphate buffer pH = 7                     | 1                                                 | 200                                            | <i>Angew. Chem. Int. Ed.</i> <b>2012</b> , <i>51</i> , 12703     |
| Mo <sub>2</sub> B                                         | —                                                                        | phosphate buffer pH = 7                     | 1                                                 | 250                                            | <i>Angew. Chem. Int. Ed.</i> <b>2012</b> , <i>51</i> , 12703     |
| CoP/CC                                                    | 0.92 mg cm <sup>-2</sup><br>carbon cloth                                 | 1.0 M phosphate buffer solution pH = 7      | 2<br>10                                           | 65<br>106                                      | <i>J. Am. Chem. Soc.</i> <b>2014</b> , <i>136</i> , 7587         |

**Table S2.** Comparison of the OER activity of CoO/CoSe<sub>2</sub> under neutral conditions with some representative OER catalysts recently reported.

| Sample                                                                     | Loading/<br>substrate             | electrolyte                                          | Onset<br>overpot<br>ential<br>/mV | Current<br>density<br>(j)/ mA<br>cm <sup>-2</sup> | Overpotentia<br>l/ mV at the<br>correspondin<br>g j | Tafel<br>slope<br>/mV dec <sup>-1</sup> | Reference                                                        |
|----------------------------------------------------------------------------|-----------------------------------|------------------------------------------------------|-----------------------------------|---------------------------------------------------|-----------------------------------------------------|-----------------------------------------|------------------------------------------------------------------|
| Co <sub>3</sub> S <sub>4</sub><br>Nanosheets                               | 0.28<br>mg/cm <sup>2</sup>        | phosphate<br>buffer solution<br>(pH = 6.86)          | 310                               | 3.97                                              | 700                                                 | 151                                     | <i>Angew. Chem. Int.<br/>Ed.</i> <b>2015</b> , <i>54</i> , 11231 |
| CoO/CoSe <sub>2</sub>                                                      | 2 mg cm <sup>-2</sup><br>Ti mesh  | 0.5 M<br>phosphate<br>buffer solution<br>(pH = 6.86) | 320                               | 33.96                                             | 620                                                 | 137                                     | This work                                                        |
| Co-based<br>phosphate/ITO                                                  | ITO                               | 0.1 M<br>potassium<br>phosphate (pH<br>= 7.0)        | 280                               | 1                                                 | 410                                                 | —                                       | <i>Science</i> , <b>2008</b> , <i>321</i> ,<br>1072              |
| Mn <sub>3</sub> (PO <sub>4</sub> ) <sub>2</sub> ·<br>3H <sub>2</sub> O/FTO | FTO                               | 0.5M<br>phosphate<br>buffer (pH =<br>7)              | 450                               | 0.316                                             | 680                                                 | 120                                     | <i>J. Am. Chem. Soc.</i><br><b>2014</b> , <i>136</i> , 7435      |
| LiCoPO <sub>4</sub>                                                        | 0.10<br>mg/cm <sup>2</sup>        | 0.1 M<br>potassium<br>phosphate (pH<br>= 7.0)        | 370                               | —                                                 | —                                                   | 120                                     | <i>J. Am. Chem. Soc.</i><br><b>2012</b> , <i>134</i> , 16959     |
| LiMnP <sub>2</sub> O <sub>7</sub>                                          | 0.25<br>mg/cm <sup>2</sup><br>FTO | phosphate<br>buffer (pH =<br>7.0)                    | 450                               | 0.5                                               | 680                                                 | 120                                     | <i>J. Am. Chem. Soc.</i><br><b>2014</b> , <i>136</i> , 4201      |
| Ni                                                                         | 17 nM<br>FTO                      | 0.5 M<br>potassium<br>borate (pH =<br>9.2)           | —                                 | 1                                                 | 540                                                 | —                                       | <i>J. Am. Chem. Soc.</i><br><b>2015</b> , <i>137</i> , 13980     |

## References:

- [1] M. R. Gao, W. T. Yao, H. B. Yao, S. H. Yu, *J. Am. Chem. Soc.* **2009**, *131*, 7486.
- [2] Y. R. Zheng, M. R. Gao, Q. Gao, H. H. Li, J. Xu, Z. Y. Wu, S. H. Yu, *Small* **2015**, *11*, 182.
